# Supplementary material for: Realising higher capacity and stability for disordered rocksalt oxyfluoride cathode materials for Li ion batteries
Source: Royal Society of Chemistry journal article supplement (doi:10.1039/d3ra05684h), 2023-01-01
Supplement: d3ra05684h1.pdf [file d3ra05684h1.pdf]

## **Realising higher capacity and stability for disordered rocksalt oxyfluoride cathode materials for Li ion batteries**

*Ying Chen<sup>1</sup> and Chun Huang<sup>1,2,3\*</sup>*

<sup>1</sup>Department of Materials, Imperial College London, London SW7 2AZ, UK

<sup>2</sup>The Faraday Institution, Quad One, Becquerel Ave, Harwell Campus, Didcot OX11 0RA,  
UK

<sup>3</sup>Research Complex at Harwell, Rutherford Appleton Laboratory, Didcot OX11 0FA, UK

Email: [a.huang@imperial.ac.uk](mailto:a.huang@imperial.ac.uk)

**Table S1:** Results from ICP-AES for LMTOF.

| Element | LMTO 5% excess in Li <sub>2</sub> CO <sub>3</sub> |        |        |
|---------|---------------------------------------------------|--------|--------|
|         | Li4602                                            | Mn2576 | Ti3349 |
| Unit    | ppm                                               | ppm    | ppm    |
| Avg     | 8.723                                             | 23.03  | 20.07  |
| Stddev  | 0.03                                              | 0.04   | 0.08   |
| %RSD    | 0.2913                                            | 0.192  | 0.3895 |

**Table S2:** Results from ICP-AES for LMTOF.

| Element | LMTOF 20% excess in Li <sub>2</sub> CO <sub>3</sub> |        |        |
|---------|-----------------------------------------------------|--------|--------|
|         | Li4602                                              | Mn2576 | Ti3349 |
| Unit    | ppm                                                 | ppm    | ppm    |
| Avg     | 3.028                                               | 8.011  | 4.715  |
| Stddev  | 0.054                                               | 0.019  | 0.039  |
| %RSD    | 1.79                                                | 0.2336 | 0.8249 |

**Table S3:** Rietveld refinement for LMTO and LMTOF materials.

| Materials                                                                               | Atom | Site | X   | Y   | Z   | fraction | Rwp    | GOF<br>(good<br>of<br>fitness) |
|-----------------------------------------------------------------------------------------|------|------|-----|-----|-----|----------|--------|--------------------------------|
| Li <sub>1.2</sub> Mn <sub>0.4</sub> Ti <sub>0.4</sub> O <sub>2</sub>                    | Li   | 4a   | 0   | 0   | 0   | 0.6      | 0.0377 | 1.91                           |
|                                                                                         | Mn   | 4a   | 0   | 0   | 0   | 0.2      |        |                                |
|                                                                                         | Ti   | 4a   | 0   | 0   | 0   | 0.2      |        |                                |
|                                                                                         | O    | 4b   | 1/2 | 1/2 | 1/2 | 1        |        |                                |
| Li <sub>1.2</sub> Mn <sub>0.4</sub> Ti <sub>0.3</sub> O <sub>1.7</sub> F <sub>0.3</sub> | Li   | 4a   | 0   | 0   | 0   | 0.6      | 0.0535 | 2.27                           |
|                                                                                         | Mn   | 4a   | 0   | 0   | 0   | 0.2      |        |                                |
|                                                                                         | Ti   | 4a   | 0   | 0   | 0   | 0.15     |        |                                |
|                                                                                         | O    | 4b   | 1/2 | 1/2 | 1/2 | 0.85     |        |                                |
|                                                                                         | F    | 4b   | 1/2 | 1/2 | 1/2 | 0.15     |        |                                |

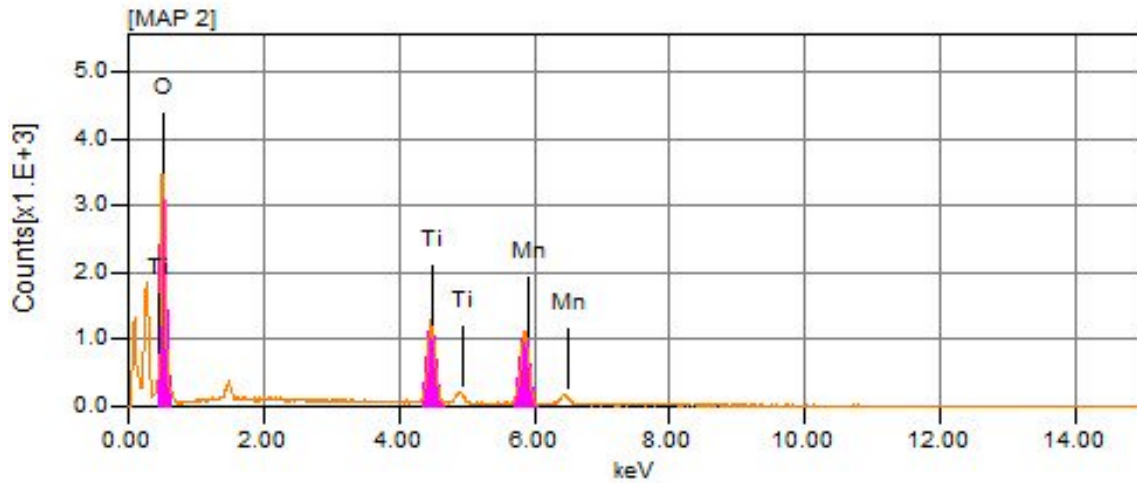

Figure S1: EDS spectrum for the EDS elemental mapping of the SEM image of LMTOF@C, showing the presence of Ti and Mn.

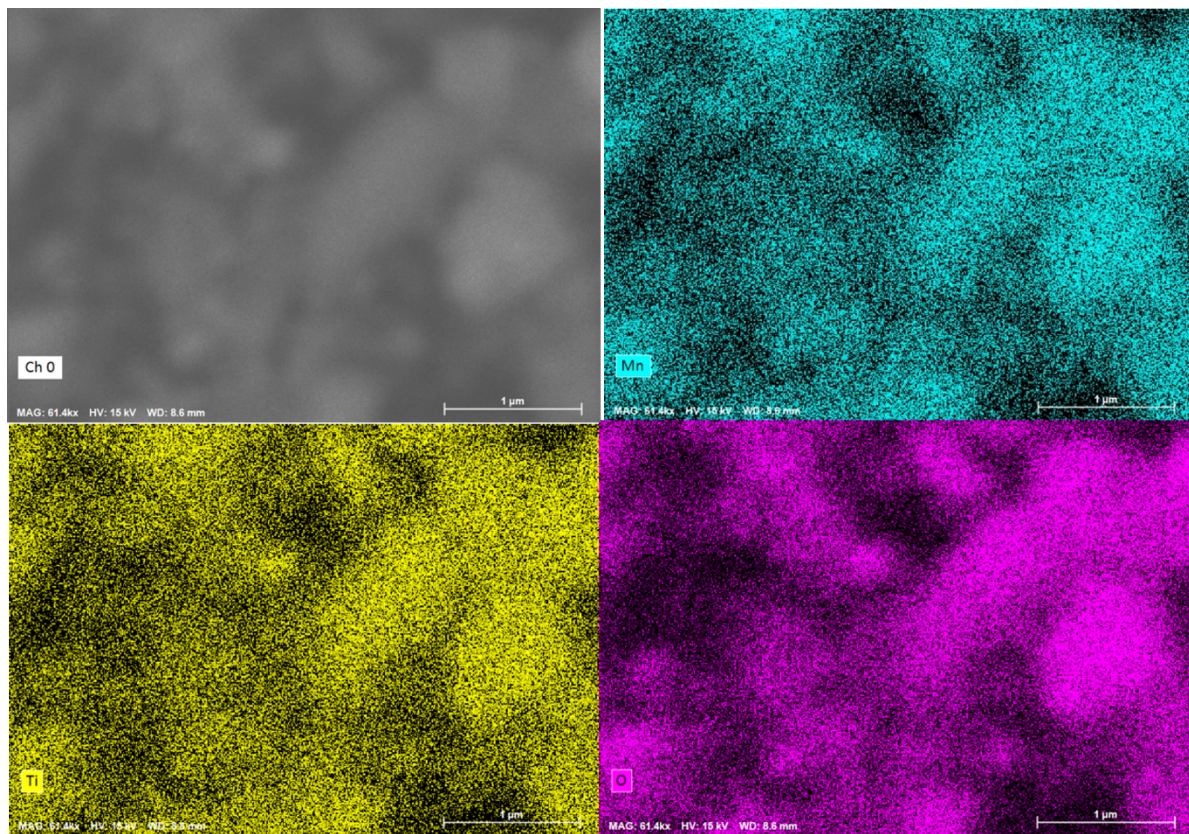

Figure S2: SEM image of LMTO@C and the corresponding EDS mapping of Mn, Ti and O.

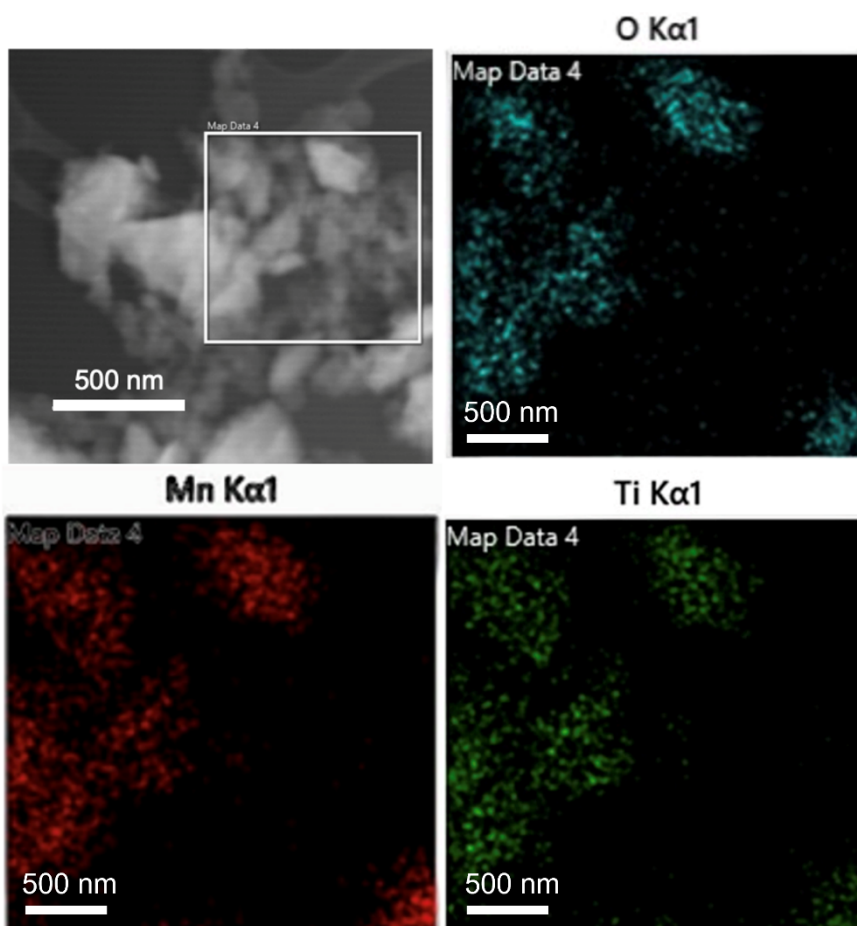

Figure S3: TEM image of individual particles of LMTO@C and the corresponding EDS mapping of the particles.

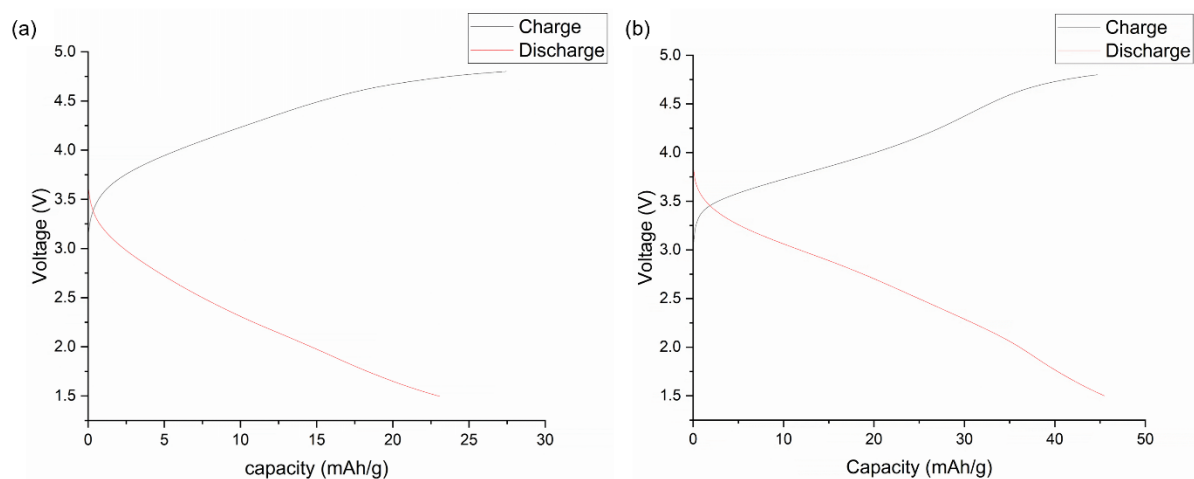

Figure S4: charging and discharge curve of LMTO-B, LMTOF-B between 1.5-4.8 V at 0.5 C.

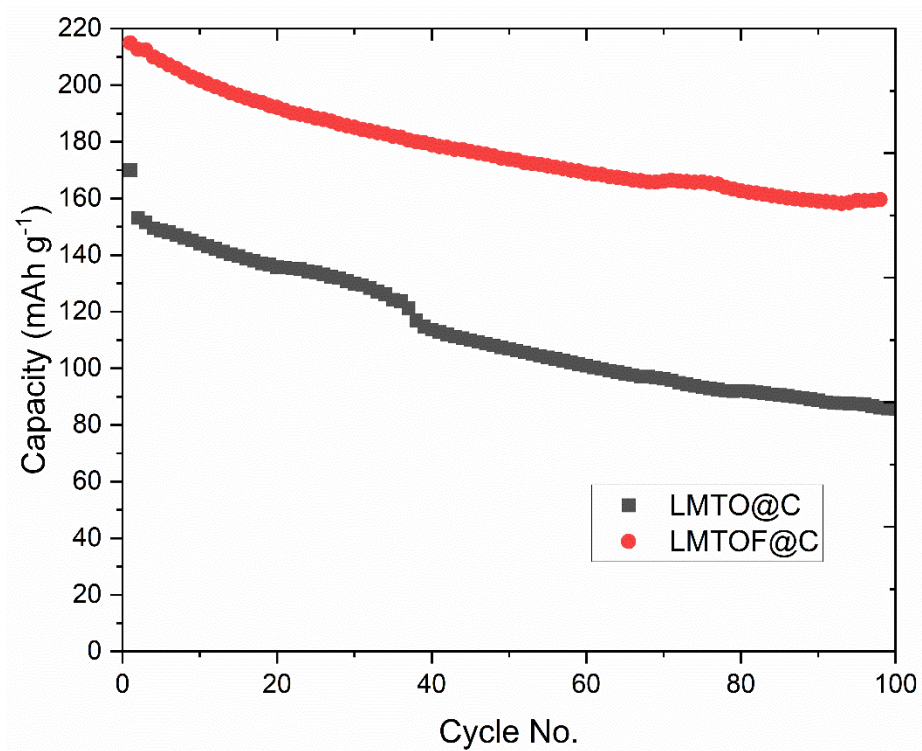

Figure S5: Cycling performance of LMTO@C, LMTOF@C between 1.5-4.8 V at 0.5 C.
